# Supplementary material for: Molecular dissection of the pea shoot apical meristem
Source: PubMed Central journal article supplement — J Exp Bot. 2009 Aug 25;60(14):4201–13. doi: 10.1093/jxb/erp254 (PMC2755034; doi:10.1093/jxb/erp254), 2009-08-25

## **Molecular dissection of pea shoot apical meristem**

*Chui E Wong, Dacheng Liang, Mohan B Singh, Christine Beveridge, Belinda Phipson, Gordon Smyth, and Prem L Bhalla*

### **Supplementary Material**

Supplementary Table S1 & Figure S1

(Supplementary Tables S2-S4 – see separate files)

**Supplementary Table S1. Functional classification of unigenes according to GO biological processes using BLAST2GO (Conesa et al., 2005).** Representative GO categories (at Level 4 or 5) with number of sequences annotated at a child GO term greater than 50 and annotation density of greater than 20 is presented to give a general overview of the annotated transcripts.

| <b>GO ID</b> | <b>Term</b>                                                                         |
|--------------|-------------------------------------------------------------------------------------|
| GO:0007166   | cell surface receptor linked signal transduction                                    |
| GO:0007010   | cytoskeleton organization and biogenesis                                            |
| GO:0044262   | cellular carbohydrate metabolic process                                             |
| GO:0051276   | chromosome organization and biogenesis                                              |
| GO:0042254   | ribosome biogenesis and assembly                                                    |
| GO:0030154   | cell differentiation                                                                |
| GO:0009651   | response to salt stress                                                             |
| GO:0009416   | response to light stimulus                                                          |
| GO:0006886   | intracellular protein transport                                                     |
| GO:0006259   | DNA metabolic process                                                               |
| GO:0031497   | chromatin assembly                                                                  |
| GO:0065004   | protein-DNA complex assembly                                                        |
| GO:0007242   | intracellular signaling cascade                                                     |
| GO:0006796   | phosphate metabolic process                                                         |
| GO:0016070   | RNA metabolic process                                                               |
| GO:0019219   | regulation of nucleobase, nucleoside, nucleotide and nucleic acid metabolic process |
| GO:0006350   | transcription                                                                       |
| GO:0006412   | translation                                                                         |
| GO:0044267   | cellular protein metabolic process                                                  |

Supplementary Figure S1. Phylogenetic analysis of (A) *PsWUS* and (B) *PsANT*-LIKE genes. Phylogenetic trees are constructed using CLUSTAL W (version 1.83) and the results displayed as NJ-tree with branch length. Nucleotide sequences of various genes other than pea were retrieved from public databases ([www.arabidopsis.org](http://www.arabidopsis.org); [www.phytozome.net](http://www.phytozome.net); [www.ncbi.nlm.nih.gov/](http://www.ncbi.nlm.nih.gov/)). WOX: WUSCHEL-related homeobox; AIN: AINTEGUMENTA; AIL:AINTEGUMENTA-LIKE).

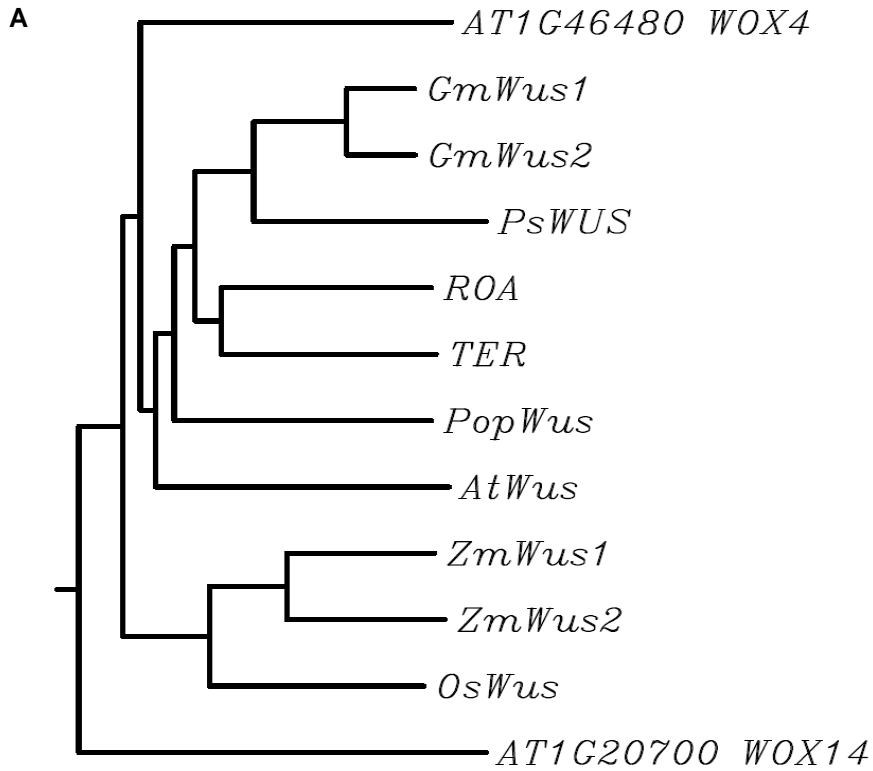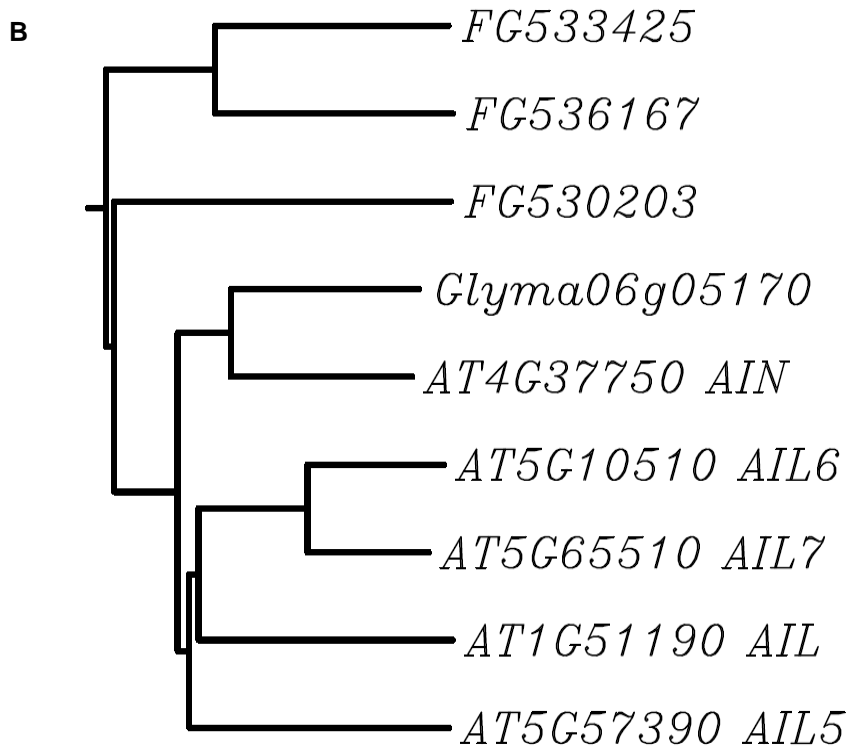

Supplement: erp254_1.pdf [file erp254_1.pdf]
